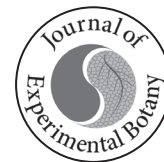

RESEARCH PAPER

# The pathway of transmembrane cadmium influx via calcium-permeable channels and its spatial characteristics along rice root

Xiaohui Chen<sup>1,\*</sup>, Younan Ouyang<sup>2,\*</sup>, Yicong Fan<sup>1</sup>, Boyin Qiu<sup>3</sup>, Guoping Zhang<sup>1</sup> and Fanrong Zeng<sup>1,†</sup>

<sup>1</sup> Institute of Crop Science, Zijingang Campus, Zhejiang University, Hangzhou 310058, China

<sup>2</sup> China National Rice Research Institute, Hangzhou 310006, China

<sup>3</sup> Key Laboratory of Crop Breeding in South Zhejiang, Wenzhou Academy of Agricultural Science, Wenzhou Vocational College of Science and Technology, Wenzhou 325006, China

\* These authors contributed equally to this work.

† Correspondence: [zengfr@zju.edu.cn](mailto:zengfr@zju.edu.cn)

Received 16 May 2018; Editorial decision 30 July 2018; Accepted 2 August 2018

Editor: Hendrik Küpper, Biology Center of the Czech Academy of Sciences, Czech Republic

## Abstract

**To develop elite crops with low cadmium (Cd), a fundamental understanding of the mechanism of Cd uptake by crop roots is necessary. Here, a new mechanism for Cd<sup>2+</sup> entry into rice root cells was investigated. The results showed that Cd<sup>2+</sup> influx in rice roots exhibited spatially and temporally dynamic patterns. There was a clear longitudinal variation in Cd uptake along rice roots, with the root tip showing much higher Cd<sup>2+</sup> influx and concentration than the root mature zone, which might be due to the much higher expression of the well-known Cd transporter genes *OsIRT1*, *OsNRAMP1*, *OsNRAMP5*, and *OsZIP1* in the root tip. Both the net Cd<sup>2+</sup> influx and the uptake of Cd in rice roots were highly inhibited by ion channel blockers Gd<sup>3+</sup> and TEA<sup>+</sup>, supplementation of Ca<sup>2+</sup> and K<sup>+</sup>, and the plasma membrane H<sup>+</sup>-ATPase inhibitor vanadate, with Gd<sup>3+</sup> and Ca<sup>2+</sup> showing the most inhibitory effects. Furthermore, Ca<sup>2+</sup>- or Gd<sup>3+</sup>-induced reduction in Cd<sup>2+</sup> influx and Cd uptake did not coincide with the expression of Cd transporter genes, but with that of two Ca channel genes, *OsAAN4* and *OsGLR3.4*. These results indicate that Cd transporters are in part responsible for Cd<sup>2+</sup> entry into rice root, and provide a new perspective that the Ca channels *OsAAN4* and *OsGLR3.4* might play an important role in rice root Cd uptake.**

**Keywords:** Calcium-permeable channels, Cd influx, Cd uptake, longitudinal variation, rice.

## Introduction

As a result of atmospheric deposition, wastewater irrigation, use of metal-containing fertilizers and pesticides, and many other industrial processes, cadmium (Cd) has become one of the most toxic and widespread environmental pollutants in agricultural soil (Rizwan *et al.*, 2016). Being a non-essential element for plants, excess Cd in soils interferes with plant growth and development,

reduces crop yield, and accumulates to a high level in plant tissues, thus posing a threat to human and animal health through the food chain (Ahmad *et al.*, 2015). To ensure food safety, breeding 'low-Cd' crops has become one of the most important strategies to reduce Cd in crops, for which a fundamental understanding of the Cd uptake mechanism in plant roots would be a critical issue.

Abbreviations: Ca, calcium; Cd, cadmium; CNGC, cyclic-nucleotide gated channel; DACC, depolarization-activated calcium channel; EZ, elongation zone; GLR, glutamate receptor; HACC, hyperpolarization-activated calcium channel; K, potassium; LCT, low affinity calcium transporter; MIFE, microelectrode ion flux estimation; MZ, mature zone; NRAMP, natural resistance-associated macrophage protein; NSCC, non-selective cation channel; PM, plasma membrane; TEA<sup>+</sup>, tetraethylammonium; VICC, voltage-insensitive cation channel; YSL, Yellow-Stripe 1-Like; ZIP, zinc/iron-regulated transporter-like protein.

© The Author(s) 2018. Published by Oxford University Press on behalf of the Society for Experimental Biology.

This is an Open Access article distributed under the terms of the Creative Commons Attribution License (<http://creativecommons.org/licenses/by/4.0/>), which permits unrestricted reuse, distribution, and reproduction in any medium, provided the original work is properly cited.

Although great progress has been achieved over the last decades, the complex pathways of Cd entry into root cells are still not fully understood. Since Cd is a non-essential element for plants and interferes with the uptake of other ions, it was assumed that Cd could be absorbed into cells by the transporters for essential elements such as  $\text{Fe}^{3+}$ ,  $\text{Zn}^{2+}$ , and  $\text{Mn}^{2+}$ , due to the lack of specificity of these transporters (Clemens 2001; Ishimaru *et al.*, 2006; Sasaki *et al.*, 2012). It has been well documented that Cd could enter into root cells through various NRAMP (natural resistance-associated macrophage protein) family members, such as OsNRAMP1, OsNRAMP5, and AtNRAMP6; ZIP (zinc/iron-regulated transporter-like protein) transporters, such as AtIRT1 and TcZNT1/TcZIP4; the low affinity calcium transporters such as TaLCT1; or through YSL (Yellow-Stripe 1-Like) proteins such as ZmYSL1 as Cd chelates (Schaaf *et al.*, 2004; Cailliatte *et al.*, 2009; Lux *et al.*, 2011, and references therein; Sasaki *et al.*, 2012;). Of all the transporters above, OsNRAMP5, which is a major contributor to constitutive  $\text{Mn}^{2+}$  uptake, was considered to be a major route of Cd uptake from the external environment and entry into cells in rice (Ishimaru *et al.*, 2012; Sasaki *et al.*, 2012). However, a recent study by Takahashi *et al.* (2014) revealed that the knock-down of OsNRAMP5 triggered only ~20% reduction in root Cd content but a significant increase in shoot Cd content in both hydroponic and field trials. These results indicated that there might be other pathways for Cd entry into root cells, apart from the poor selectivity of transition ion transporters. Indeed, some studies suggested that Cd could also possibly be taken up via cation channels, such as  $\text{K}^+$  and  $\text{Ca}^{2+}$  channels, which are relatively non-selective between cations (White and Broadley, 2003; Lindberg *et al.*, 2004; L.Z. Li *et al.*, 2012). However, the contribution of this pathway to root Cd uptake remains to be further verified. Therefore, more effort is still needed to elucidate thoroughly the mechanism by which Cd is taken up into plant roots and cells.

With the innovation of non-invasive microelectrode measurements such as the microelectrode ion flux estimation (MIFE) technique (Newman, 2001; Shabala, 2006) and Cd-selective microelectrodes (Piñeros *et al.* 1998),  $\text{Cd}^{2+}$  fluxes have been characterized in various Cd-hyperaccumulating plants (He *et al.*, 2011, L.Z. Li *et al.*, 2012; Sun *et al.*, 2013). However, little is known about the kinetics of  $\text{Cd}^{2+}$  flux across root cells in the rice plant, which is considered to be a model among monocots for biological research. Furthermore, as rice is a staple food crop for half of the world's population, Cd in rice grain has become a major source of dietary Cd intake for this part of the world (Wang *et al.*, 2016). Therefore, the characteristics of the transmembrane  $\text{Cd}^{2+}$  transport and Cd uptake in different root zones were investigated in this study in the absence and presence of a series of treatments by measuring  $\text{Cd}^{2+}$  flux, Cd concentration, Cd fluorescence localization, and gene expression. The aim of this study was (i) to reveal the longitudinal variation in  $\text{Cd}^{2+}$  influx and Cd distribution along rice root and explain how such variation is generated; and (ii) to elucidate whether  $\text{Cd}^{2+}$  enters into rice root cells through ion channels permeable to  $\text{Ca}^{2+}$  or  $\text{K}^+$  and explore the candidate transporter genes involved in this process.

## Materials and methods

### *Plant materials, growth conditions, and treatments*

Rice cultivar IR8, which accumulates high amounts of Cd (Yan *et al.*, 2010), was used in the present study. Seeds were surface sterilized with 12.5% NaClO solution, thoroughly rinsed with tap water, and then soaked in distilled water at 25 °C. Two days later, the seeds were germinated with limited water at 35 °C for another 1 d, and sown on the mesh screen in a container with nutrient solution. All the rice seedlings were grown in a controlled-environmental chamber with a photoperiod of 16 h light/8 h dark, light intensity of  $225 \pm 25 \mu\text{mol m}^{-2} \text{s}^{-1}$ , temperature of 30 °C light/25 °C dark, and relative humidity of 85%. The nutrient solution was made according to Zeng *et al.* (2008). Uniform 10-day-old seedlings were selected for electrophysiological measurements or to be treated with 20  $\mu\text{M}$   $\text{CdCl}_2$  with/without different blockers for further investigations.

### *Microelectrode $\text{Cd}^{2+}$ flux measurements*

Net  $\text{Cd}^{2+}$  fluxes were measured from the root epidermis of rice seedlings using non-invasive ion-selective vibrating microelectrodes (the MIFE technique, University of Tasmania, Hobart, Australia). The Cd ion-selective microelectrodes with tip diameter of 2–3  $\mu\text{m}$  were manufactured and silanized with tributylchlorosilane (Cat. No. 90796; Sigma-Aldrich, Steinem, Switzerland), and then back-filled with an electrolyte buffer (0.1 mM KCl plus 10 mM  $\text{CdCl}_2$ ) and front-filled with an ion-selective  $\text{Cd}^{2+}$  cocktail made up with  $\text{Cd}^{2+}$  ionophore I, potassium tetrakis, and 2-nitrophenyl octyl ether (Cat. Nos 20909, 60588, and 73732; Sigma-Aldrich) according to Piñeros *et al.* (1998). The well-filled microelectrodes were equilibrated in basic salt medium solution (BSM; 0.5 mM KCl plus 0.10 mM  $\text{CaCl}_2$ , buffered with 5 mM MES and 2 mM Tris at pH 5.6) for 1 h and calibrated in 5, 10, and 20  $\mu\text{M}$  Cd in the absence and presence of either pharmaceutical prior to the  $\text{Cd}^{2+}$  flux measurement. Only electrodes with Nernstian slopes  $\geq 25$  mV and correlation  $> 0.9990$  were used. Details on measuring ion flux have been described previously (Newman, 2001; Shabala, 2006).

### *Experimental protocols for MIFE measurements*

#### *Measurement of $\text{Cd}^{2+}$ flux along the rice root*

$\text{Cd}^{2+}$  flux profiles along rice root were measured after 1 h incubation in BSM containing 20  $\mu\text{M}$   $\text{CdCl}_2$ . Root scanning started from the root cap and was carried out with 0.1 mm increments between 0 mm and 1 mm, 0.5 mm increments between 1 mm and 10 mm, and 1.0 mm increments between 10 mm and 20 mm, with net ion fluxes measured for 1 min at each point. Five individual seedlings were measured for each treatment.

#### *Transient ion flux kinetics*

Roots ( $\geq 5$  cm) of intact seedlings were mounted in a horizontal chamber filled with 30 ml of BSM 1 h prior to measurements. Net ion fluxes were measured for 5 min under the control condition (BSM) to record the steady control flux values. Subsequently, 2 ml or 10 ml of  $\text{CdCl}_2$  stock (80  $\mu\text{M}$ , made up in the background of BSM) was gently added to the chamber to yield the final  $\text{Cd}^{2+}$  concentration of 5  $\mu\text{M}$  or 20  $\mu\text{M}$ , and the transient ion flux responses were measured for another 30 min. The period of time for mixing the solution (~2 min) was omitted from the data analysis and figures. Net ion fluxes were measured in either the elongation zone (EZ, ~2 mm from the root cap, without root hair) or the mature zone (MZ, ~10 mm from the root cap, with root hair). Six individual seedlings were measured for each treatment.

#### *Pharmacological measurements*

In pharmacological experiments, plants roots were pre-treated for 1 h prior to measurements with 30 ml of one of the following solutions: 100  $\mu\text{M}$  sodium orthovanadate (vanadate); 20 mM tetraethylammonium chloride hydrate ( $\text{TEA}^+$ ); 100  $\mu\text{M}$   $\text{GdCl}_3$  ( $\text{Gd}^{3+}$ ); 5 mM  $\text{CaCl}_2$ ; or 10 mM KCl. Net  $\text{Cd}^{2+}$  fluxes were first measured for 5 min under the condition with either pharmacological treatment to record the steady control flux

values. Subsequently, 10 ml of CdCl<sub>2</sub> stock (80 μM, made up in the background of BSM with each corresponding pharmaceutical) was gently added to the chamber to yield the final Cd concentration of 20 μM, and the transient ion flux responses were measured for another 30 min. All the above pharmacological solutions were made up in the background of BSM, and buffered with MES–Tris (5 mM MES, 2 mM Tris base) at pH 5.6. Five individual seedlings were measured for each treatment.

#### Fluorescence labeling of Cd in root

Rice roots were pre-treated with different pharmaceuticals for 1 h, and then given the appropriate volume of Cd stock to yield the final Cd concentration of 20 μM. Rice roots were subsequently treated for 24 h prior to measurements. Cadmium stock was made up in the background of BSM with each corresponding pharmaceutical, and the one made up in the background of BSM only was used as the control. The localization of Cd in rice roots was investigated using the Cd Probe Leadmium Green AM dye (Molecular Probes, Invitrogen, Calsbad, CA, USA) according to L.Z. Li *et al.* (2012) with some modifications. Briefly, a stock solution of fluorescent dye was made by adding 50 ml of DMSO to one vial of Leadmium Green AM. The stock dye solution was then diluted 1:10 with 0.85% NaCl prior to being used. Root segments of 5 mm long from the root cap were thoroughly immersed in diluted dye solution for 1.5 h in the dark. The root segments were rinsed sequentially with 0.85% NaCl, 1 mM Na<sub>2</sub>EDTA, and distilled water, and subsequently slowly shaken in 0.85% NaCl solution for 24 h to get rid of all Cd ions from the root surface. Thereafter, the thoroughly washed root segments were observed under a fluorescence microscope (ECLIPSE, Nikon, Japan) with excitation at 488 nm and emission at 500–550 nm. Images were taken with a megapixel digital color camera (Leica DFC425C, Leica Microsystems) and images were acquired using ACDsee software (ACDSee Pro 8, ACD Systems International Inc., Canada). All the features of the camera were set to constant values for each image as follows: exposure time 1.3 s for fluorescence, gain 1.5×, saturation 1.5×, and gamma 1.0×. Each test was repeated at least eight times. The fluorescence intensity was calculated with Image J software (version 1.8.0, National Institutes of Health, USA).

#### Determination of root Cd concentration by ICP-MS

The concentration of Cd in rice roots pre-treated with different pharmaceuticals plus 20 μM Cd (see the details in the section on Cd fluorescence labeling) for 3 d was investigated by the inductively coupled plasma mass spectrometry (ICP-MS) technique. Prior to the determination, the roots from each treatment were immersed with 1 mM Na<sub>2</sub>EDTA for 15 min to remove the metal ions from the root surface, and washed thoroughly with double-distilled water. Thereafter, root segments 0–5, 5–10, 10–15, and 15–20 mm from the root cap and the bulk roots were separately collected and oven dried at 70 °C. The weighted dry samples were wet-digested with HNO<sub>3</sub> plus HClO<sub>4</sub> (HNO<sub>3</sub>:HClO<sub>4</sub> =4:1). The resulting clear solutions were diluted with Mili Q water with a ratio of 1:4. Cd concentration was determined using the NexION300X (PerkinElmer, USA) with radial configuration.

#### RNA extraction and qRT-PCR

The transcript levels of genes involved in Cd transmembrane transport, such as *OsIRT1*, *OsNRAMP1*, *OsNRAMP5*, and *OsZIP1*, were determined in both the root tip (0–5 mm from the root cap) and the MZ (15–20 mm from the root cap) of rice root. At 0 h, 3 h, and 3 d of 20 μM Cd treatment, root segments from the root tip and the MZ of IR8 were collected and immediately frozen in liquid nitrogen for total RNA extraction. Three biological replicates were measured for each treatment.

To investigate the impact of pharmaceuticals on the expression of genes involved in Cd, Ca, and K transmembrane transport, the seedlings of IR8 were treated with 20 μM Cd and with or without different pharmaceuticals as described in the Cd fluorescence labeling experiment. At 3 h and 3 d of Cd treatment, the bulk of roots from two seedlings were collected and immediately frozen in liquid nitrogen for total RNA extraction. Three biological replicates were measured for each treatment.

Total RNA was isolated using the MiniBEST Plant RNA Extraction Kit (TaKaRa, Japan), and quantitative real-time PCR (qRT-PCR) was performed using Light Cycler 480 II (Roche, Swiss Confederation) with the iTaq™ Universal SYBR Green Spermix (Bio-Rad Laboratories, USA). Primer sequences for qRT-PCR are listed in [Supplementary Table S1](#) at *JXB* online. Three technical replicates were performed for each biological replicate. The relative gene expression was calculated based on the 2<sup>-ΔΔCt</sup> method using *OsActin* as the internal standard (Livak and Schmittgen, 2001).

#### Data analysis

Statistical analysis was performed by a statistical package IBM SPSS Statistics 20 (IBM, New York, USA). All data in the figures and table are given as means ±SE. The significant difference between means was evaluated by ANOVA test. Significant differences among the means were compared using Tukey's multiple range tests.

## Results

### Profiles of net Cd<sup>2+</sup> flux along rice roots

To verify whether different root zones would show different Cd<sup>2+</sup> uptake ability, transient Cd<sup>2+</sup> flux was measured from different regions along the root axis (0–20 mm) after 1 h exposure to 20 μM CdCl<sub>2</sub> (Fig. 1). Net Cd<sup>2+</sup> influx was observed at all positions examined along the rice root, which was saturated at 0.6 mm and started to stabilize ~6 mm from the root cap. The root tip (including the meristem and EZs) showed much stronger Cd<sup>2+</sup> influx than the MZ, with the largest Cd<sup>2+</sup> influx of ~6 nmol m<sup>-2</sup> s<sup>-1</sup> measured at 0.6 mm from root cap. This is ~4-fold greater than average Cd<sup>2+</sup> influx in the MZ (10–20 mm).

### Net Cd<sup>2+</sup> fluxes of rice root epidermal cells under different Cd concentrations

Prior to adding CdCl<sub>2</sub> treatments, Cd<sup>2+</sup> fluxes were kept at ~0 nmol m<sup>-2</sup> s<sup>-1</sup> (Fig. 2), indicating that no Cd uptake occurred

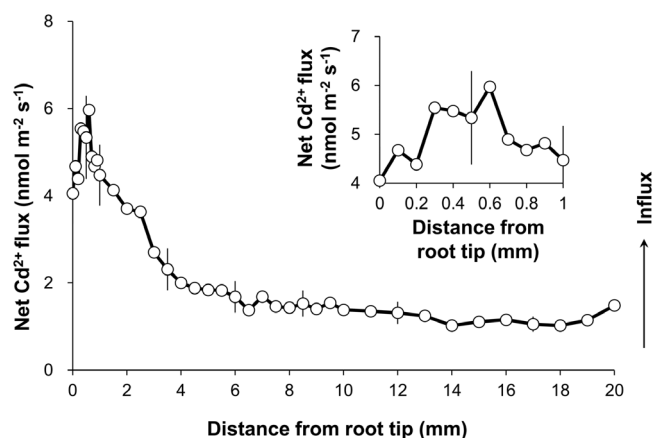

**Fig. 1.** Net Cd<sup>2+</sup> flux profiles along the root axis of cultivar IR8. Net Cd<sup>2+</sup> fluxes were measured after 1 h exposure to 20 μM CdCl<sub>2</sub> with 0.1 mm increments between 0 mm and 1 mm, 0.5 mm increments between 1 mm and 10 mm, and 1.0 mm increments between 10 mm and 20 mm, starting from the root cap. The insert displays the close-up view of net Cd<sup>2+</sup> flux along the root segment between 0 mm and 1 mm. At each position, an average Cd<sup>2+</sup> flux was measured for 1 min before the electrode was repositioned. Data are means ±SE (*n*=5). For all MIFE data, the sign convention is 'influx positive'.

under the control condition. However, external  $\text{CdCl}_2$  treatments resulted in immediate  $\text{Cd}^{2+}$  influx from the rice root surface (Fig. 2A, B). Also, a clear dose–response relationship was found between the external Cd concentration and magnitude of  $\text{Cd}^{2+}$  influx, with a >8-fold larger magnitude of  $\text{Cd}^{2+}$  flux observed under 20  $\mu\text{M}$   $\text{CdCl}_2$  (32.8  $\text{nmol m}^{-2} \text{s}^{-1}$  at the EZ and 21.7  $\text{nmol m}^{-2} \text{s}^{-1}$  at the MZ) than under 5  $\mu\text{M}$   $\text{CdCl}_2$  (3.9  $\text{nmol m}^{-2} \text{s}^{-1}$  at the EZ and 2.2  $\text{nmol m}^{-2} \text{s}^{-1}$  at the MZ) (Fig. 2C, D). A similar difference was also found for the mean  $\text{Cd}^{2+}$  influx over the total measurement time of 30 min. In addition, the sharp increase in net  $\text{Cd}^{2+}$  influx after Cd addition was very short lived and declined to the steady-state value in 20–25 min.

As expected, a significant difference in the net  $\text{Cd}^{2+}$  influx was found between the EZ and MZ, regardless of the external Cd concentration. The EZ showed a >1.5-fold higher magnitude, mean, or steady-state value of  $\text{Cd}^{2+}$  flux than the MZ, in agreement with the results of the  $\text{Cd}^{2+}$  flux profile along the root (Fig. 1).

#### Net $\text{Cd}^{2+}$ fluxes from rice root in the presence of a proton pump inhibitor and ion channel blockers

The effects of a proton pump inhibitor and channel blockers on  $\text{Cd}^{2+}$  flux kinetics were studied to reveal the possible pathways mediating root Cd uptake. None of the inhibitors used

in the present study significantly affected the control ion flux after 1 h of incubation (Fig. 3; Table 1).

Root pre-treatment in 100  $\mu\text{M}$  vanadate, a well-known inhibitor of plasma membrane (PM)  $\text{H}^+$ -ATPase, caused reduction of the net  $\text{Cd}^{2+}$  influx response to 20  $\mu\text{M}$   $\text{CdCl}_2$  treatment, leading to a reduction in the magnitude of  $\text{Cd}^{2+}$  influx by 3.4-fold for the EZ and 4.2-fold for the MZ, the steady-state  $\text{Cd}^{2+}$  influx by 2.4-fold for the EZ and 1.8-fold for the MZ, and the mean  $\text{Cd}^{2+}$  influx by 3.4-fold for both the EZ and MZ (Fig. 3A; Table 1). However, such an inhibitory effect of vanadate was short lived and started to recover ~20 min after adding Cd treatment for the EZ and only 5 min for the MZ.

$\text{TEA}^+$  is a known blocker of  $\text{K}^+$ -selective channels (Maathuis and Sanders, 1996). Pre-treatment with 20 mM  $\text{TEA}^+$  caused a significant decrease of the  $\text{Cd}^{2+}$  influx, with the magnitude of  $\text{Cd}^{2+}$  influx reduced by 2.7-fold for the EZ and 3.8-fold for the MZ, the steady-state  $\text{Cd}^{2+}$  influx reduced by 4.2-fold for the EZ and 4.7-fold for the MZ, and the mean  $\text{Cd}^{2+}$  influx reduced by 3.6-fold for the EZ and 4.2-fold for the MZ (Fig. 3B; Table 1).

$\text{Gd}^{3+}$  is a known blocker of non-selective cation channels (NSCCs), which are known to be permeable to cations such as  $\text{Ca}^{2+}$ ,  $\text{K}^+$ , and  $\text{Na}^+$  (Demidchik *et al.*, 2002). In comparison with vanadate and  $\text{TEA}^+$ , pre-treatment with 100  $\mu\text{M}$   $\text{Gd}^{3+}$  induced the largest inhibitory effect on the response of  $\text{Cd}^{2+}$

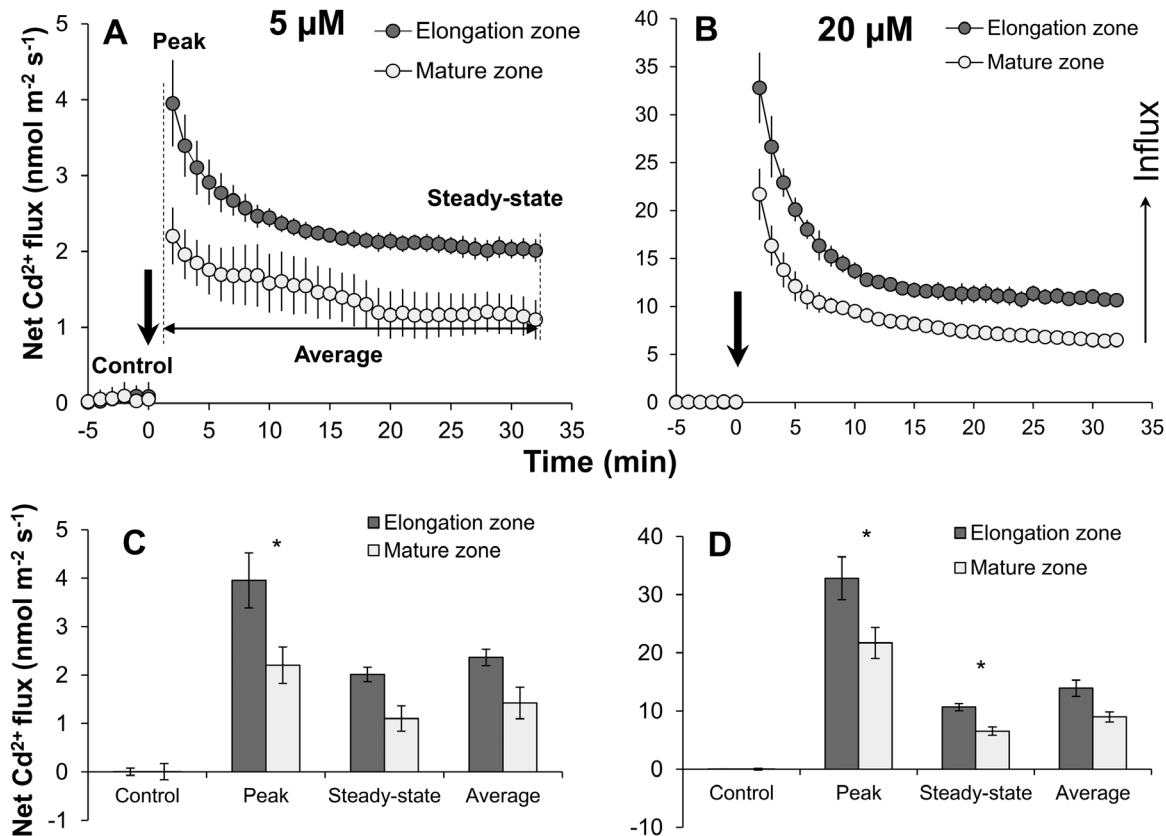

**Fig. 2.** Kinetics of net  $\text{Cd}^{2+}$  fluxes measured from the elongation zone (EZ; ~2 mm from the root cap, without root hair) and mature zone (MZ; ~10 mm from the root cap, with root hair). (A and B) Transient  $\text{Cd}^{2+}$  fluxes in response to 5  $\mu\text{M}$  or 20  $\mu\text{M}$   $\text{CdCl}_2$ ; Cd treatments were applied at time 0 as indicated by arrows. (C and D) Initial  $\text{Cd}^{2+}$  flux (under control conditions before  $\text{CdCl}_2$  treatments), magnitude of  $\text{Cd}^{2+}$  influx (immediately after  $\text{CdCl}_2$  treatments), steady-state  $\text{Cd}^{2+}$  influx (at the end of the measurements), and average  $\text{Cd}^{2+}$  influx (measured over the 30 min after  $\text{CdCl}_2$  application) as shown in (A). Data are means  $\pm$  SE ( $n=6$ ). An asterisk shows the significant difference between two root zones at  $P < 0.05$ .

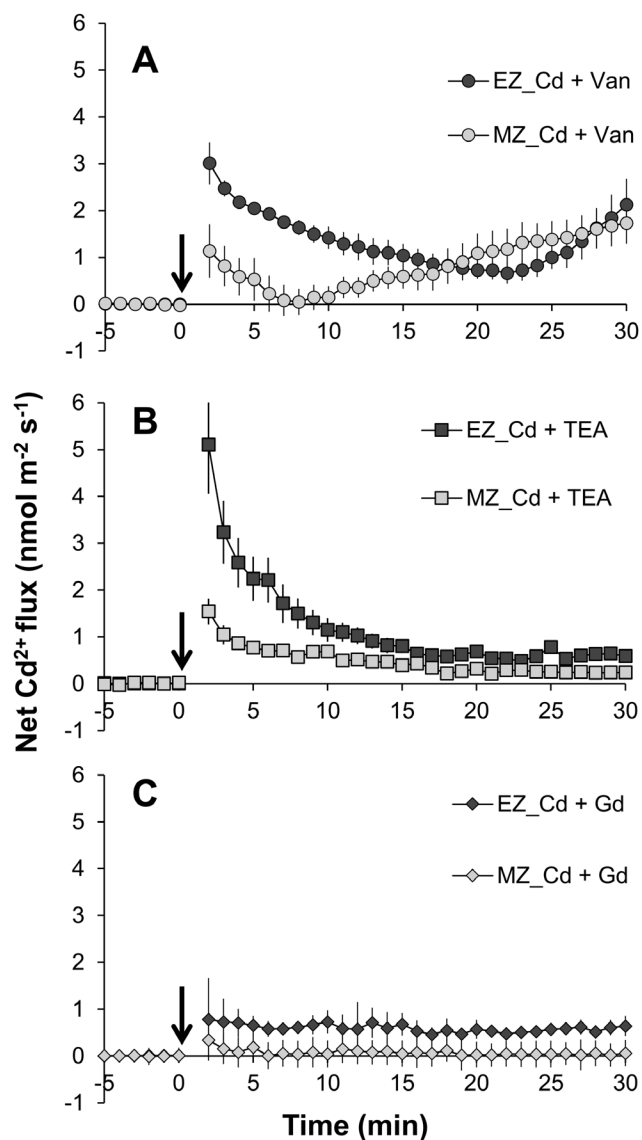

**Fig. 3.** Transient Cd<sup>2+</sup> fluxes in response to 20  $\mu\text{M}$  CdCl<sub>2</sub> treatment (added at time zero) from the elongation EZ;  $\sim 2$  mm from the root cap, without root hair) and mature zone (MZ;  $\sim 10$  mm from the root cap, with root hair) of rice roots pre-treated with 100  $\mu\text{M}$  vanadate (A), 20 mM TEA<sup>+</sup> (B), or 100  $\mu\text{M}$  Gd<sup>3+</sup> (C). Roots were pre-treated with various inhibitors for 1 h before the CdCl<sub>2</sub> solution (prepared in the background of each inhibitor) was added. Data are means  $\pm$ SE ( $n=5$ ).

flux (Fig. 3C; Table 1). It totally blocked the Cd<sup>2+</sup> influx to  $<1$  nmol m<sup>-2</sup> s<sup>-1</sup> in both the EZ and MZ. The magnitude, steady-state, and mean Cd<sup>2+</sup> influx were reduced by 4.1- to 5.4-fold for the EZ and by 6.0- to 6.9-fold for the MZ.

Moreover, like the performance under the treatment with Cd only, the EZ also showed much higher net Cd<sup>2+</sup> influxes than the EZ under treatments with all three inhibitors, with a 1.2- to 10.8-fold difference in the magnitude, steady-state, or mean value of the Cd<sup>2+</sup> influx.

#### Net Cd<sup>2+</sup> flux changes under elevated external K and Ca concentration

It has been well documented that Cd significantly interferes with the uptake and accumulation of various nutrients in plant

tissues, including K<sup>+</sup> and Ca<sup>2+</sup> (Chang *et al.*, 2003; S. Li *et al.*, 2012; Farooq *et al.*, 2016). Conversely, the supplementation of K<sup>+</sup> and Ca<sup>2+</sup> was also reported to reduce Cd accumulation efficiently in plant tissues (Ahmad *et al.*, 2015, 2016). To examine whether the supplementation of K<sup>+</sup> and Ca<sup>2+</sup> interfered with the kinetics of net Cd<sup>2+</sup> influx, rice roots were pre-treated with 10 mM K<sup>+</sup> or 5 mM Ca<sup>2+</sup> for 1 h before measuring the net Cd<sup>2+</sup> flux. Pre-treatment with 10 mM K<sup>+</sup> strongly reduced the net Cd<sup>2+</sup> influx into the rice root, causing an  $\sim 2.5$ -fold reduction in the magnitude of Cd<sup>2+</sup> influx and an  $\sim 3.0$ -fold reduction in the mean Cd<sup>2+</sup> influx for both the EZ and MZ in comparison with the basic K<sup>+</sup> level of 0.5 mM (Fig. 4A; Table 1). Surprisingly, the effect of 5 mM Ca<sup>2+</sup> on Cd<sup>2+</sup> influx was different between the EZ and MZ (Fig. 4B; Table 1). The pre-treatment with 5 mM Ca<sup>2+</sup> reduced the Cd<sup>2+</sup> influx in the EZ by  $\sim 5.0$ -fold. However, the Cd<sup>2+</sup> flux response to 20  $\mu\text{M}$  CdCl<sub>2</sub> in the MZ was altered by the pre-treatment with 5 mM Ca<sup>2+</sup>. At the beginning of Cd application, the net Cd<sup>2+</sup> influx was completely inhibited, whereas it was slowly recovered with extension of the measuring time.

#### Total Cd concentration

Total Cd concentration was determined in either root segments or the bulk roots of rice seedlings pre-treated with different pharmacological agents after 3 d of Cd exposure to verify the results of MIFE measurements (Fig. 5). Results from Cd determination were mostly in agreement with MIFE data. The root tip (0–5 mm from root cap) had a significantly higher Cd concentration than those segments far away from it (5–10, 10–15, and 15–20 mm from the root cap) ( $P<0.05$ ; Fig. 5A). Pre-treatment with vanadate, TEA<sup>+</sup>, Gd<sup>3+</sup>, K<sup>+</sup>, and Ca<sup>2+</sup> significantly restricted the accumulation of Cd in rice roots, both in each root segment and in the bulk roots (Fig. 5). Their inhibitory effects on Cd accumulation were in the order of Gd<sup>3+</sup> (58.1%)  $\sim$ Ca<sup>2+</sup> (55.6%)  $>$ K<sup>+</sup> (32.2%)  $\sim$ TEA<sup>+</sup> (31.1%)  $>$ vanadate (16.5%) (Fig. 5B).

#### The distribution of Cd along the rice root

The effect of inhibitors and nutrients on Cd<sup>2+</sup> distribution along rice roots ( $\sim 5$  mm long from the root cap) was further investigated using Leadmium Green AM dye after 24 h of Cd exposure (Fig. 6). One hour after the incubation with the fluorescent dye, a clear and bright green fluorescence was observed in the roots treated with 20  $\mu\text{M}$  Cd only (Fig. 6). Pre-treatment with ion channel blockers TEA<sup>+</sup> and Gd<sup>3+</sup> suppressed Cd green fluorescence in rice roots (Fig. 6), with the NSCC blocker Gd<sup>3+</sup> showing a much stronger inhibitory effect than the potassium-selective channel blocker TEA<sup>+</sup>. Supplementation of K<sup>+</sup> and Ca<sup>2+</sup> also caused significant reduction in the Cd green fluorescence in rice roots (Fig. 6), but much greater inhibition was seen for Ca<sup>2+</sup> than for K<sup>+</sup>. Pre-treatment with vanadate showed much less impact on Cd green fluorescence in rice roots compared with the other pharmacological treatments (Fig. 6), in agreement with the results of the Cd concentration (Fig. 5). These results suggest that Cd exhibits its high affinity for Ca<sup>2+</sup>-binding sites over K<sup>+</sup>-binding sites

**Table 1.** Mean control, peak, steady-state, and average Cd<sup>2+</sup> flux of rice roots pre-treated with different pharmacological agents

|              | Root zone | Cd fluxes under different pharmacological treatments (nmol m <sup>-2</sup> s <sup>-1</sup> ) |                            |                            |                           |                             |
|--------------|-----------|----------------------------------------------------------------------------------------------|----------------------------|----------------------------|---------------------------|-----------------------------|
|              |           | Cd+vanadate                                                                                  | Cd+TEA                     | Cd+Gd                      | Cd+K                      | Cd+Ca                       |
| Control      | EZ        | 0.005 ± 0.009<br>(-0.5)                                                                      | 0.006 ± 0.002<br>(-0.4)    | 0.006 ± 0.038<br>(-0.4)    | 0.008 ± 0.006<br>(0.0)    | 0.005 ± 0.000<br>(-0.8)     |
|              | MZ        | 0.003 ± 0.098<br>(-0.2)                                                                      | 0.004 ± 0.063<br>(-0.1)    | 0.003 ± 0.136<br>(-0.5)    | 0.003 ± 0.086<br>(-0.2)   | 0.003 ± 0.149<br>(-0.6)     |
| Peak         | EZ        | 3.009 ± 0.449<br>(-3.4**)                                                                    | 5.106 ± 3.156<br>(-2.7*)   | 0.781 ± 0.883<br>(-5.4***) | 5.717 ± 1.005<br>(-2.5*)  | 1.151 ± 0.443<br>(-4.8***)  |
|              | MZ        | 1.138 ± 0.856<br>(-4.2**)                                                                    | 1.541 ± 0.275<br>(-3.8**)  | 0.341 ± 0.438<br>(-6.0***) | 3.438 ± 1.493<br>(-2.6*)  | 0.019 ± 0.283<br>(-10.2***) |
| Steady-state | EZ        | 2.129 ± 0.544<br>(-2.4*)                                                                     | 0.591 ± 0.137<br>(-4.2**)  | 0.639 ± 0.216<br>(-4.1**)  | 1.389 ± 0.427<br>(-3.0**) | 0.230 ± 0.013<br>(-5.6***)  |
|              | MZ        | 1.734 ± 0.662<br>(-1.8*)                                                                     | 0.239 ± 0.108<br>(-4.7***) | 0.059 ± 0.279<br>(-6.7***) | 1.212 ± 0.090<br>(-2.3*)  | 0.727 ± 0.263<br>(-3.1**)   |
| Average      | EZ        | 1.375 ± 0.250<br>(-3.4**)                                                                    | 1.199 ± 0.410<br>(-3.6**)  | 0.596 ± 0.240<br>(-4.6***) | 1.842 ± 0.536<br>(-2.9*)  | 0.395 ± 0.097<br>(-5.2***)  |
|              | MZ        | 0.832 ± 0.548<br>(-3.4**)                                                                    | 0.482 ± 0.100<br>(-4.2**)  | 0.073 ± 0.292<br>(-6.9***) | 1.287 ± 0.337<br>(-2.8*)  | 0.511 ± 0.180<br>(-4.1**)   |

Control, Cd<sup>2+</sup> flux under control conditions before CdCl<sub>2</sub> treatments; Peak, Cd<sup>2+</sup> influx immediately after CdCl<sub>2</sub> treatments; Steady-state, Cd<sup>2+</sup> influx at the end of the measurements; Average, Cd<sup>2+</sup> influx measured over the 30 min after CdCl<sub>2</sub> application. Cd+vanadate, 20 μM CdCl<sub>2</sub> with pre-treatment with 100 μM vanadate; Cd+TEA, 20 μM CdCl<sub>2</sub> with pre-treatment with 20 mM TEA<sup>+</sup>; Cd+Gd, 20 μM CdCl<sub>2</sub> with pre-treatment with 100 μM Gd<sup>3+</sup>; Cd+K, 20 μM CdCl<sub>2</sub> with pre-treatment with 10 mM K<sup>+</sup>; Cd+Ca, 20 μM CdCl<sub>2</sub> with pre-treatment with 5 mM Ca<sup>2+</sup>. Cd<sup>2+</sup> flux data are the mean ± SE (n=5). Data in parentheses are the fold changes of each pharmacological treatment relative to Cd treatment only, fold change=log<sub>2</sub>[(Cd<sup>2+</sup> flux)<sub>pharmacological treatment</sub>/(Cd<sup>2+</sup> flux)<sub>Cd only</sub>]. \*, \*\*, or \*\*\* represents the significance between the treatment with CdCl<sub>2</sub> plus various pharmaceuticals and the treatment with CdCl<sub>2</sub> only at P < 0.05, 0.01, or 0.001.

during transport across the PM. In addition, a stronger intensity of Cd green fluorescence was observed close to the root cap, regardless of pre-treatments, in accordance with the results of the Cd<sup>2+</sup> flux profile along the root in our study Fig. 1 or in previous studies (Piñeros et al., 1998; Sun et al., 2013).

#### Gene expression at different root zones

The measurements of MIFE (Figs 1, 2), ICP-MS (Fig. 5), and Leadmium Green AM dying (Fig. 6) indicated that there was a significant difference in Cd influx and accumulation between the root tip and the MZ. To reveal the reason for such a difference, the expression level of genes for Cd transport was investigated in the root tip (0–5 mm from the root cap) and the MZ (15–20 mm from the root cap). As expected, the expression of *OsIRT1*, *OsNRAMP1*, *OsNRAMP5*, and *OsZIP1* was induced by 20 μM Cd (Fig. 7), regardless of root zones. Surprisingly, the transcript levels of all these genes were much higher in the root tip than in the MZ prior to or at 3 h after Cd treatment (Fig. 7). With the exposure time of Cd treatment increasing to 3 d, although the difference in gene expression between the root tip and the MZ was greatly reduced, the transcript levels of *OsIRT1* and *OsZIP1* were still significantly higher in the root tip than in the MZ. These results indicated that the root tip had much greater capacity for Cd transport than the MZ, which consequently led to more Cd influx and accumulation in the root tip.

#### Gene expression under pharmacological treatments

As mentioned above, Cd<sup>2+</sup> influx and uptake were significantly inhibited by the treatments with different pharmaceuticals

(100 μM vanadate, 20 mM TEA<sup>+</sup>, and 100 μM Gd<sup>3+</sup>) and with elevation of Ca and K levels in the medium (5 mM CaCl<sub>2</sub> and 10 mM KCl) (Figs 3–6). One possible reason for such an inhibitory impact of these pharmacological treatments on Cd<sup>2+</sup> influx could be attributed to the significant reduction in Cd transport activity by the application of these pharmacological treatments. Therefore, the gene expression of four major plasma transporters for Cd, namely *OsIRT1*, *OsNRAMP5*, *OsNRAMP1*, and *OsZIP1*, was determined by qRT-PCR under treatment with 20 μM Cd with or without the pharmaceuticals. Under treatment with 20 μM Cd for 3 h and 3 d, the expression of *OsIRT1*, *OsNRAMP5*, *OsNRAMP1*, and *OsZIP1* was significantly induced (Fig. 8A). With the pharmaceuticals under the Cd condition, the expression of *OsIRT1* and *OsZIP1* was inhibited by the application of vanadate and the elevation of Ca and K in the medium, but such inhibition was nearly extinguished when the exposure time increased to 3 d (Fig. 8B). The expression of *OsNRAMP1* was significantly inhibited by the application of vanadate at both exposure times of Cd treatment (Fig. 8B). Surprisingly, however, the expression of *OsNRAMP5* was not inhibited but induced by the all of the above pharmacological treatments (Fig. 8B). These results indicated that the pharmacological treatment-induced (especially Gd<sup>3+</sup>-induced) inhibition in Cd<sup>2+</sup> influx had little to do with the gene expression of the above four major plasma Cd transporters.

To examine the role of genes relevant to the pharmacological treatment-induced inhibition in Cd<sup>2+</sup> influx, the transcript levels of 10 genes involved in transmembrane transport of Ca (*OsANN1*, *OsANN4*, *OsCNGC1*, *OsGLR3.4*, *OsTPC1*, *OsACA3*, *OsACA7*, and *OsCAX2*) and K (*OsAKT1* and *OsHAK5*) were also determined under treatment with 20 μM

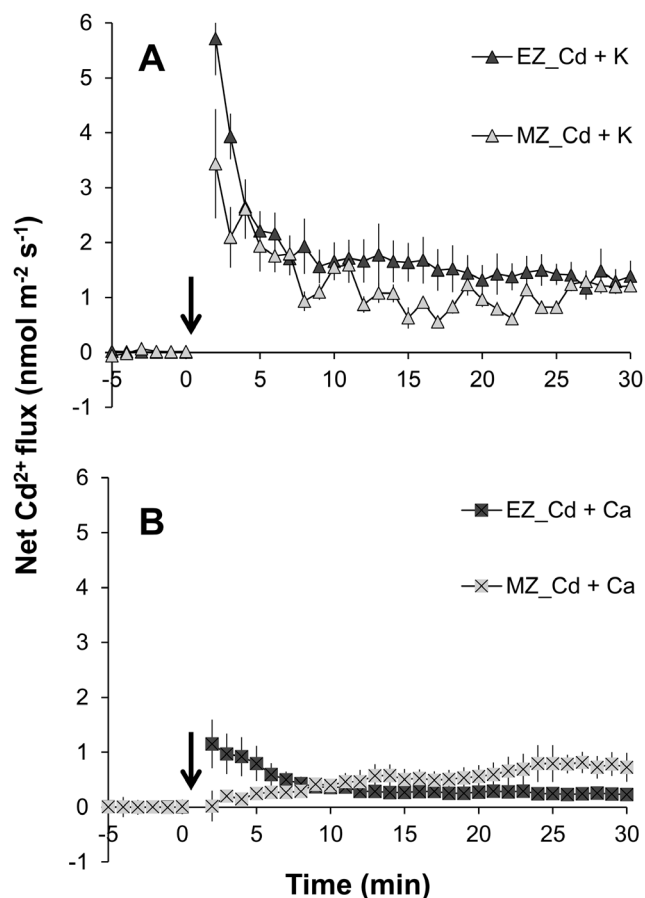

**Fig. 4.** Transient Cd<sup>2+</sup> fluxes in response to 20 μM CdCl<sub>2</sub> treatment (added at time zero) from the elongation zone (EZ; ~2 mm from the root cap, without root hair) and mature zone (MZ; ~10 mm from the root cap, with root hair) of rice roots pre-treated with 10 mM K<sup>+</sup> (A) or 5 mM Ca<sup>2+</sup> (B). Roots were pre-treated with solution containing high K<sup>+</sup> or Ca<sup>2+</sup> concentration for 1 h before the CdCl<sub>2</sub> solution (prepared in the background of high K<sup>+</sup> or Ca<sup>2+</sup> concentration). Data are means ±SE (n=5).

Cd with or without the pharmaceuticals. Results showed that three genes encoding Ca channels and transporters, namely *OsANN4*, *OsGLR3.4* and *OsCAX2*, were induced by the treatment with 20 μM Cd (Fig. 8A). The expression of *OsANN4* was inhibited by all the pharmacological treatments at 3 h and 3 d of Cd treatment (Fig. 8B). The expression of *OsGLR3.4* was significantly inhibited by the application of Gd<sup>3+</sup> and the elevation of Ca and K in the medium at both exposure times of Cd treatment (Fig. 8B). On the other hand, the expression of *OsCAX2* was significantly inhibited by the application of vanadate and TEA<sup>+</sup> at both exposure times of Cd treatment and the elevation of K at 3 d of Cd treatment (Fig. 8B). The expression of these three genes under the pharmacological treatments partially coincided with the results of Cd<sup>2+</sup> influx and uptake (Figs 3–6), indicating a possible function for these proteins in transmembrane Cd transport.

## Discussion

### *Cd uptake varies longitudinally along the rice root*

In this study, the spatial kinetics of net Cd<sup>2+</sup> flux across rice root cells was examined using the MIFE technique, which has

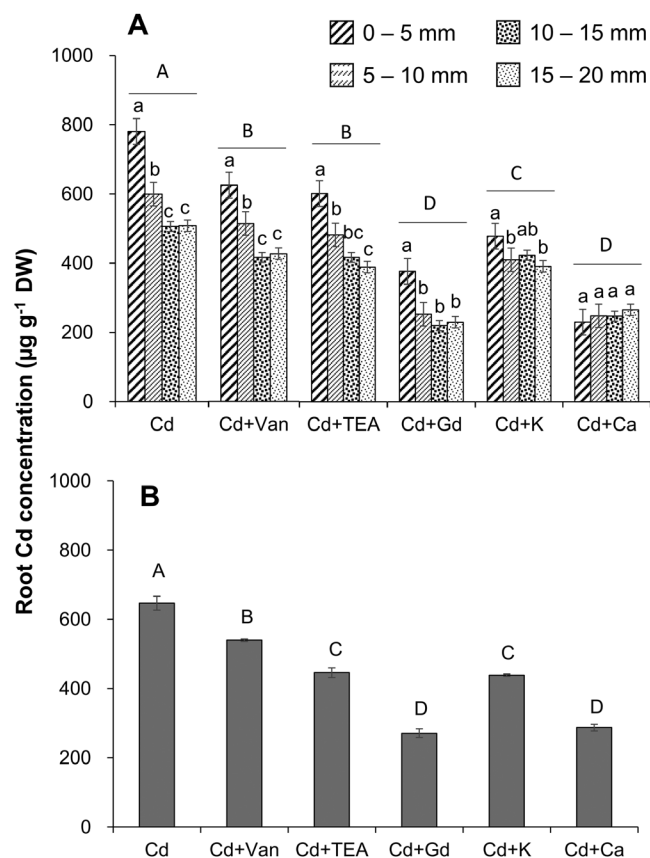

**Fig. 5.** Total Cd concentration in rice root segments (0–5, 5–10, 10–15, and 15–20 mm from the root cap (A) and bulk roots (B) after 3 d of 20 μM CdCl<sub>2</sub> treatment without or with 100 μM vanadate, 20 mM TEA<sup>+</sup>, 100 μM Gd<sup>3+</sup>, 10 mM K<sup>+</sup>, or 5 mM Ca<sup>2+</sup>. Roots were pre-treated with various pharmaceuticals for 1 h before the CdCl<sub>2</sub> solution (prepared in the background of each pharmacological reagent) was added. Data are means ±SE (n=5). Different lower case letters represent a significant difference between root segments at P<0.05; different upper case letters represent the significant difference between treatments at P<0.05.

a high spatial and temporal resolution and sensitivity to ion movement. In agreement with the previous microelectrode measurements in other plant species (Piñeros *et al.*, 1998; He *et al.*, 2011; Sun *et al.*, 2013), the present study found that the Cd<sup>2+</sup> influx in roots of rice exposed to 20 μM CdCl<sub>2</sub> was much greater in the root tip (0–2 mm from the root cap) than in the MZ (10–20 mm from root cap) (Figs 1, 2), which was further evidenced by the measurements of Cd concentration in root segments and the fluorescent labeling of Cd ions in the root tip, whether with or without pre-treatments (Figs 5, 6). Similar longitudinal variation in Cd<sup>2+</sup> influx was also observed in sunflower roots using radioactive tracer techniques (Laporte *et al.*, 2013).

There may be several reasons to explain such longitudinal variation in Cd<sup>2+</sup> influx. First, it may result from the alteration of root anatomy; that is, the development of Casparian bands and suberin lamellae in the endodermis and exodermis and cell lignification (Schreiber *et al.*, 1999; White, 2001; Laporte *et al.*, 2013). It has been documented that the presence of Cd produced Casparian bands, suberin lamellae, and lignification, which could restrict the apoplastic diffusion of Cd in root cells and consequently the whole-plant Cd accumulation (Enstone

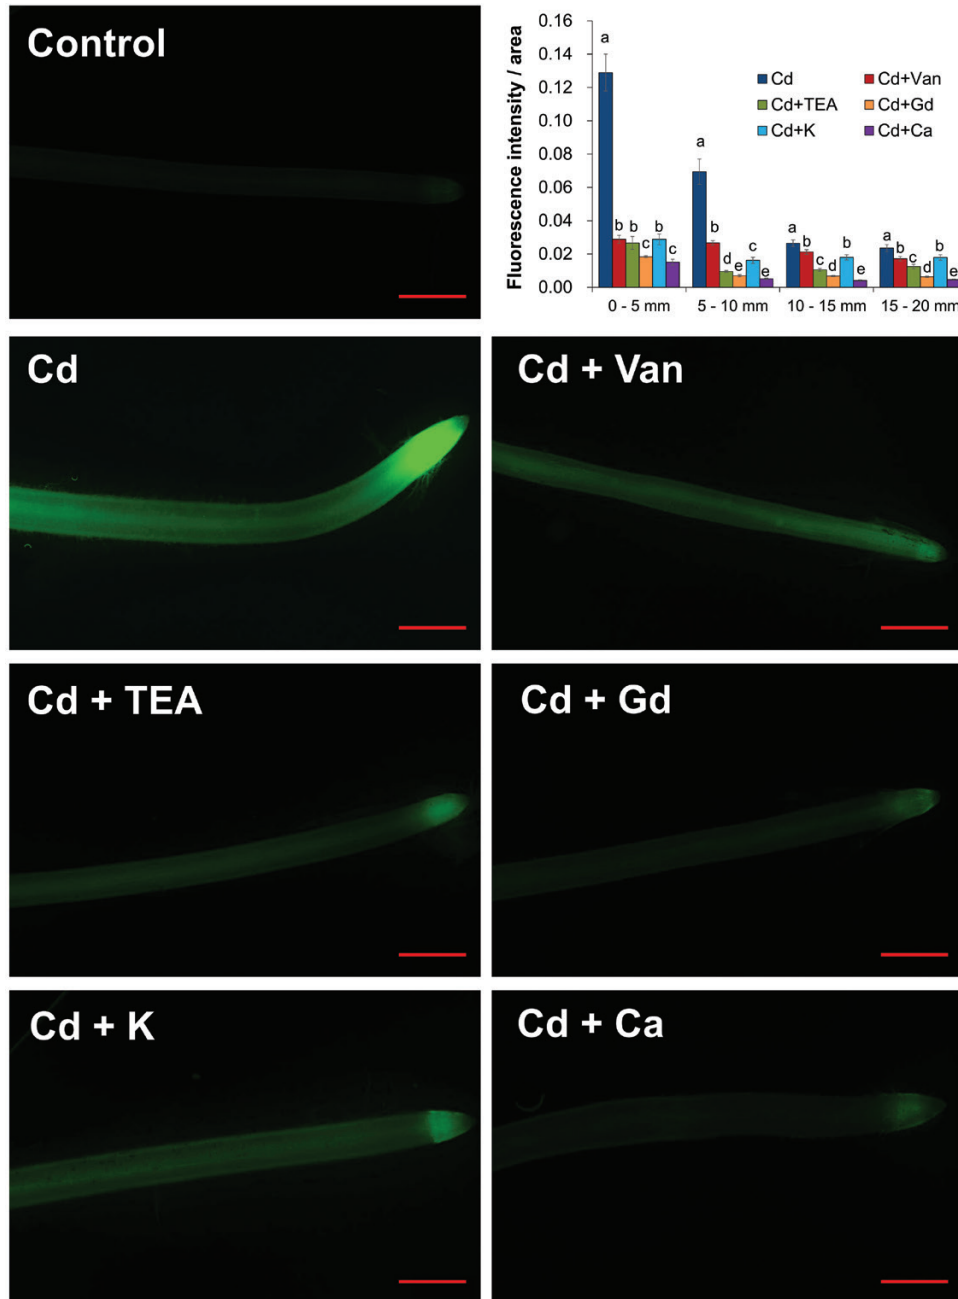

**Fig. 6.**  $\text{Cd}^{2+}$  accumulation in rice root, visualized by fluorescent imaging using Leadmium Green AM dye. Control, root without  $\text{CdCl}_2$  treatment; Cd, roots treated with  $20 \mu\text{M}$   $\text{CdCl}_2$  only for 24 h; Cd + Van, Cd + TEA, Cd + Gd, Cd + K or Cd + Ca: roots pre-treated with  $100 \mu\text{M}$  vanadate,  $20 \text{mM}$   $\text{TEA}^+$ ,  $100 \mu\text{M}$   $\text{Gd}^{3+}$ ,  $10 \text{mM}$   $\text{K}^+$ , or  $5 \text{mM}$   $\text{Ca}^{2+}$ , respectively for 1 h before the  $\text{CdCl}_2$  solution (prepared in the background of each pharmaceutical) was added. Green fluorescence in the image represents the binding of the dye to Cd. One (of 8–12) representative images is shown for each treatment. Scale bar=500  $\mu\text{m}$ . Data are means  $\pm$ SE ( $n=8-12$ ). Different lower case letters represent a significant difference between pharmacological treatments at  $P < 0.05$ .

*et al.*, 2002; Lux *et al.*, 2004, 2011; Redjala *et al.*, 2011; Laporte *et al.*, 2013). In the present study, however, no significant difference in the development of Casparian bands and suberin lamellae and cell lignification was observed between the root tip (0–2 mm from root cap) and the MZ (10–15 mm from root cap) after 3 d of  $20 \mu\text{M}$   $\text{CdCl}_2$  (data not shown), indicating an inability of the apoplastic barrier to explain the occurrence of longitudinal variation in  $\text{Cd}^{2+}$  influx in this study. Another plausible reason for the longitudinal variation in  $\text{Cd}^{2+}$  influx may be attributed to the higher Cd transport activity of the

root tip than the MZ, which could be reflected by the expression level of transporters for Cd. As expected, much higher expression of four well-known Cd transport genes, namely *OsIRT1*, *OsNRAMP1*, *OsNRAMP5*, and *OsZIP1* (Uraguchi and Fujiwara, 2012), was observed in the root tip than in the MZ, both prior to and after onset of Cd treatment (Fig. 7). These findings suggest that the cells of the meristem and EZs have stronger absorbing capacity for Cd uptake than the mature root cells, which might be attributed to the greater energy in that part of roots (Jones, 1998).



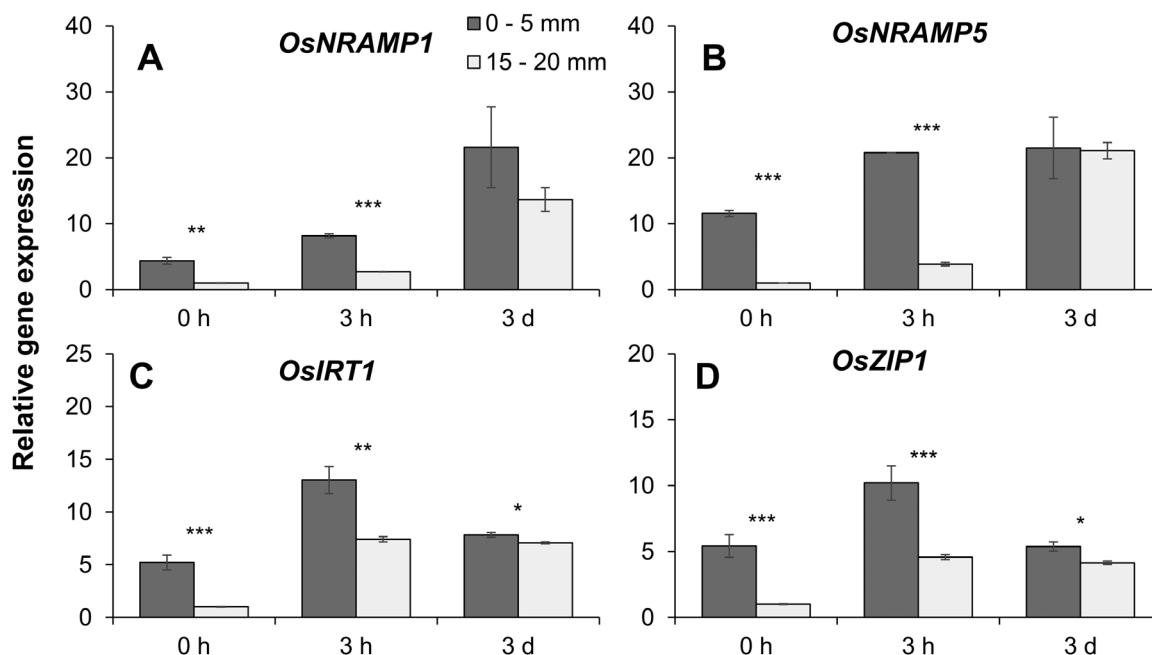

**Fig. 7.** Gene expression of Cd transporters in rice root tip (0–5 mm from the root cap) and mature (15–20 mm from the root cap) zones prior to (0 h) or after onset of 20  $\mu\text{M}$  CdCl<sub>2</sub> for 3 h and 3 d. Gene expression in the mature zone at 0 h was normalized to 1, and gene expression in the other root tissues or at the other time were all compared relative to it. Data are means  $\pm$  SE ( $n=3$  biological replicates). \*, \*\*, or \*\*\* represent a significant difference between two root zones at  $P<0.05$ , 0.01, or 0.001.

#### Cd can enter into rice root cells via the pathways for Ca and K

A fundamental understanding of how Cd is taken up by rice roots would be a critical issue for revealing the mechanisms of Cd accumulation in rice grains. However, the non-essentiality and toxicity of Cd to plants make its entry into root cells a deep mystery. With years of effort, many transporters for essential elements, such as OsNRAMPs, OsZIPs, and OsIRTs, have been demonstrated to have an influx activity of Cd<sup>2+</sup> in rice roots (reviewed by Uruguchi and Fujiwara, 2012, 2013). In the present study, our results revealed that the transcript levels of *OsIRT1*, *OsNRAMP1*, *OsNRAMP5*, and *OsZIP1* were indeed significantly induced by Cd treatment (Fig. 8A), proving their contribution to Cd uptake by rice roots. With the pharmacological treatments (100  $\mu\text{M}$  vanadate, 20 mM TEA<sup>+</sup>, 100  $\mu\text{M}$  Gd<sup>3+</sup>, 5 mM CaCl<sub>2</sub>, or 10 mM KCl) under Cd conditions, the expression of these four genes was either not changed or even up-regulated (Fig. 8B), especially for *OsNRAMP5* which is considered to be a major route of Cd uptake from the external environment and entry into cells in rice (Ishimaru *et al.*, 2012; Sasaki *et al.*, 2012). However, our MIFE and ICP-MS measurements revealed that the Cd<sup>2+</sup> influx and uptake were significantly inhibited by the pharmacological treatments mentioned above (Figs 3–5), suggesting that these transporters only contribute in part to root Cd<sup>2+</sup> influx and uptake, at least in the case where the external Cd concentration is as high as 20  $\mu\text{M}$  in the present study (Lee and An, 2009; Takahashi *et al.*, 2014). Therefore, it can be assumed that there might be other pathways for Cd entry into rice root cells.

It is well known that there is a competition between Cd<sup>2+</sup> and Ca<sup>2+</sup>, because of their similarities in charge and ionic

radius (Lindberg *et al.*, 2004; L.Z. Li *et al.*, 2012; S. Li *et al.*, 2012; Ahmad *et al.*, 2016). Many studies have reported that Cd may compete with Ca for uptake through ion channels in insects (Craig *et al.*, 1999), humans (Souza *et al.*, 1997), and plant guard cells (Perfus-Barbeoch *et al.*, 2002). The previous studies on Cd hyperaccumulators have also suggested that Cd could possibly enter the PM of root cells via Ca<sup>2+</sup> channels (Lindberg *et al.*, 2004; Lu *et al.*, 2010; L.Z. Li *et al.*, 2012; Zhang *et al.*, 2017). To obtain an insight into the role of the Ca pathway in rice root Cd uptake, the present study investigated the competitive interactions of Cd and Ca with different techniques. The results of pharmacological measurements clearly showed that the elevation of the Ca level (from 0.1 mM to 5 mM) in the medium significantly inhibited root Cd uptake, in terms of both transient Cd<sup>2+</sup> influx (Fig. 4; Table 1) and long-term total Cd uptake in rice roots (Figs 5, 6). These results suggested that Cd entry into rice roots was probably through Ca channels or transporters. Actually, several kinds of calcium-permeable channels, such as depolarization-activated calcium channels (DACCs), hyperpolarization-activated calcium channels (HACCs), and voltage-insensitive cation channels (VICCs), were reported to mediate Cd transport in plant roots (Lux *et al.*, 2011, and references therein). All of these channels are relatively non-selective between cations, and can be blocked by the NSCCs blocker Gd<sup>3+</sup> (Lux *et al.*, 2011, and references therein). Indeed, the transient net Cd<sup>2+</sup> influx of rice root in this study was completely blocked by Gd<sup>3+</sup> (Fig. 3; Table 1) and the total Cd concentration in rice root was reduced by 58.1% (Fig. 5), implying that these non-selective channels may mediate Cd<sup>2+</sup> transmembrane transport as it does for Ca<sup>2+</sup> (S. Li *et al.*, 2012).

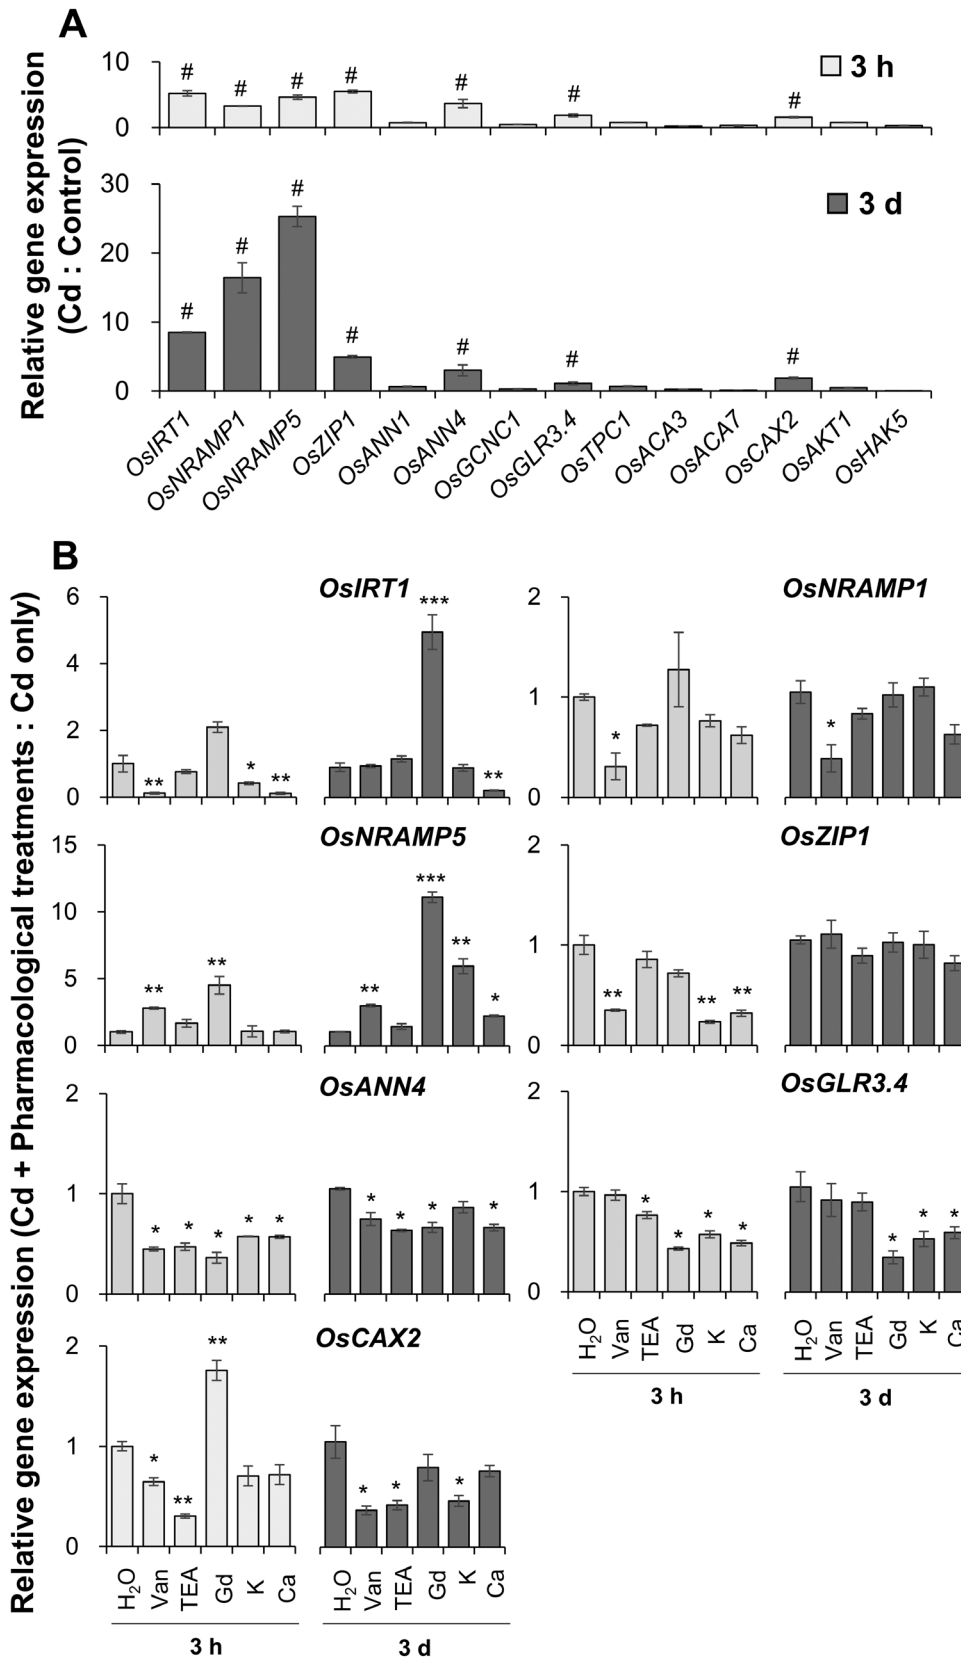

**Fig. 8.** Gene expression of Cd transporters, Ca or K channels, and transporters under 20  $\mu\text{M}$   $\text{CdCl}_2$  without (A) or with (B) pharmacological treatments: 100  $\mu\text{M}$  vanadate, 20 mM TEA<sup>+</sup>, 100  $\mu\text{M}$  Gd<sup>3+</sup>, 10 mM K<sup>+</sup>, or 5 mM Ca<sup>2+</sup> in the bulk roots. (A) Gene expression under Cd was compared relative to the control condition without Cd; (B) gene expression under Cd treatment plus pharmaceuticals was compared relative to the treatment with Cd only (H<sub>2</sub>O). Data are means  $\pm$ SE ( $n=3$  biological replicates). # in (A) represents the genes induced by 20  $\mu\text{M}$   $\text{CdCl}_2$ ; \*, \*\*, or \*\*\* in (B) represent the significance between the treatment with  $\text{CdCl}_2$  plus various pharmaceuticals and the treatment with  $\text{CdCl}_2$  only at  $P<0.05$ , 0.01, or 0.001.

Potassium is the most abundant element in the plant cytosol and plays a vital role in nullifying the adverse impacts of stress on plants (Cakmak, 2005). Ahmad *et al.* (2016) reported that K supplementation could minimize the uptake of Cd. In the present study, the elevation of the K level (from 0.5 mM to 10 mM) in the medium was also observed to reduce the transient Cd<sup>2+</sup> influx (Fig. 4; Table 1) and long-term total Cd uptake in rice roots (Figs 5, 6). These results indicated that the uptake of Cd into the cytosol of rice roots proceeds through channels permeable to K<sup>+</sup>. This was confirmed by the >95% reduction in the net Cd<sup>2+</sup> influx (Fig. 3; Table 1) and 31.1% reduction in total Cd concentration (Fig. 5) of rice roots pre-treated with 20 mM TEA<sup>+</sup>, which is a well-known blocker of K<sup>+</sup>-selective channels (Maathuis and Sanders, 1996). A similar result was also found in the pharmacological measurements with fluorescent imaging in this study (Fig. 6) and in previous studies (Lindberg *et al.*, 2004). Unfortunately, no K channel or transporter has been found in plants yet to have the capacity to transport Cd<sup>2+</sup>, and the transcript levels of two well-known genes for transporting K to the cytosol (i.e. *OsAKT1* and *OsHAK5*) were not significantly induced by Cd treatment (Fig. 8A). However, one prokaryotic potassium channel isolated from *Methanobacterium thermoautotrophicum* named MthK, which contains a region called the regulator of the conductance of K<sup>+</sup> (RCK) domain, has been found to bind divalent cations, such as Cd<sup>2+</sup> and Ca<sup>2+</sup> (Jiang *et al.*, 2002; Dvir *et al.*, 2010). It is also activated by Cd<sup>2+</sup> more effectively than by Ca<sup>2+</sup> (Kuo *et al.*, 2007). So, it could be hypothesized that some K channels, which have structural homology to the RCK domain of MthK, might have an ability to binding to Cd<sup>2+</sup> similar to that of MthK. Indeed, several channels from higher plants, such as CASTOR and POLLUX in *Lotus japonicas* (Charpentier *et al.*, 2008), DMI1 (DOES NOT MAKE INFECTIONS1) in *Medicago truncatula* (Ané *et al.*, 2004), and SYM8 in *Pisum sativum*, have already been reported to share a short stretch of predicted structural homology with the pore region of MthK (Edwards *et al.*, 2007). All these channels are identified to bind Ca<sup>2+</sup> and have the biological function of ion transmembrane transport. Yet there is no information reported yet on the possibility of these channels binding to and transporting Cd<sup>2+</sup>.

*Annexins and GLRs seems to be an important pool to explore the candidate channels participating in Cd absorption into rice root*

It has been speculated that in Arabidopsis the gene families annotated as cyclic-nucleotide gated channels (CNGCs) and/or glutamate receptors (GLRs) are the most likely sources of genes encoding VICCs (Demidchik *et al.*, 2002; White, 2004; Swarbreck *et al.*, 2013). Moreover, it has also been suggested that the *AtTPC1* gene encodes a DACC (Furuichi *et al.*, 2001), and the annexin genes encode HACCs (White *et al.*, 2002). Thus, the expression level of several genes in these families and the other Ca transporter genes, namely *OsGLR3.4* (an ortholog of *AtGLR3.4*; Vincill *et al.*, 2012; Ni *et al.*, 2016), *OsCNGC1* (an ortholog of *AtCNGC1*; Nawaz *et al.*, 2014), *OsTPC1* (Kurusu *et al.*, 2004), *OsANN1* and *OsANN4* (LOC\_Os01g31270 and LOC\_Os05g31760; Jami *et al.*, 2012),

*OsACA3* and *OsACA7*, and *OsCAX2*, which are involved in the transmembrane transport of Ca<sup>2+</sup> (Singh *et al.*, 2014), were determined after onset of 20 μM Cd for 3 h and 3 d with or without pharmacological treatments. The results showed that three of them, *OsANN4*, *OsGLR3.4*, and *OsCAX2*, were induced by the treatment with 20 μM Cd (Fig. 8A). However, the expression of these genes was reduced by the application of pharmacological treatments to a different extent (Fig. 8B), partially coinciding with the results of Cd<sup>2+</sup> influx and uptake (Figs 3–6), suggesting a possible function of these channels or transporters in transmembrane Cd transport. The response of annexin genes to Cd has been reported previously. Orthologs of *OsANN4*, such as *ANNAh3* in peanut (He *et al.*, 2015) and *ZmAux9* in maize (Zhou *et al.*, 2013), were found to be induced by short (2–24 h) or long (14 d) Cd treatments. Furthermore, the ortholog of *OsCAX2* in Arabidopsis, *AtCAX2*, has been identified as a PM Cd transporter into root cells (Hirschi *et al.*, 2000). Therefore, the contribution of these channels or transporters to Cd absorption into rice root should not be ignored.

*Plasma membrane potential plays an important role in controlling transmembrane Cd transport*

It is surprising that much greater inhibition of rice root Cd uptake was seen for Ca<sup>2+</sup> and Gd<sup>3+</sup> than for K<sup>+</sup> and TEA<sup>+</sup> (Figs 3–6; Table 1). Furthermore, a patch-clamp experiment on guard cells of fava bean demonstrated that Cd could permeate through Ca channels rather than K channels in guard cells (Perfus-Barbeoch *et al.*, 2002). These results suggest that Cd exhibits high affinity for Ca<sup>2+</sup>-binding sites over K<sup>+</sup>-binding sites during transport across the PM. In addition, pre-treatment with vanadate (a well-known inhibitor of PM H<sup>+</sup>-ATPase) also showed a significant impact on net influx (Fig. 3; Table 1) and the total uptake (Figs 5, 6) of Cd<sup>2+</sup> in rice roots, although its inhibitory effect was much less compared with the other pharmacological agents used in the present study, indicating that the uptake of Cd into root cells is partly dependent on membrane potential. So, it cannot be excluded that the pharmaceuticals in this study may inhibit the uptake of cadmium by depolarizing the PM, as they all can trigger membrane potential depolarization (Huddart and Hill, 1996). It has been reported that high K<sup>+</sup> in the medium was likely to depolarize the membrane by opening high conductance K<sup>+</sup> channels (Beilby, 1985), and high Ca<sup>2+</sup> in the medium could reduce background conductance which was thought to be mediated by the NSCCs (Shepherd *et al.*, 2008). Therefore, it would be expected that Cd may enter root cells via hyperpolarized ion channels, for example the HACCs, such as *OsANN4* in the present study, like those described in previous studies (Perfus-Barbeoch *et al.*, 2002; Lux *et al.*, 2011; L.Z. Li *et al.*, 2012).

In conclusion, Cd uptake exhibited a clear longitudinal variation along rice roots, with the root tip (including the meristem and EZs) showing much higher Cd<sup>2+</sup> influx and Cd concentration than the MZ, which might be attributed to the much higher gene expression of *OsIRT1*, *OsNRAMP1*, *OsNRAMP5*, and *OsZIP1* in comparison with the MZ. The Cd<sup>2+</sup> uptake by rice root cells was restricted by the blockage of ion channels and the elevated external levels of K<sup>+</sup> and Ca<sup>2+</sup>,

regardless of Cd exposure time, suggesting an important role for ion channels permeable to cations such as  $K^+$  and  $Ca^{2+}$  in transmembrane Cd transport. The Cd transporters OsIRT1, OsNRAMP1, OsNRAMP5, and OsZIP1 are in part responsible for the  $Cd^{2+}$  entry into rice root, and the Ca channels OsAAN4 and OsGLR3.4 might play an important role in rice root Cd uptake. However, the permeability and selectivity of these channels to  $Cd^{2+}$  and their value in 'low-Cd' rice innovation need to be further elucidated using electrophysiological and molecular techniques.

## Supplementary data

Supplementary data are available at *JXB* online.

Table S1. Primers for qRT-PCR.

## Acknowledgements

This work was supported by the National Natural Science Foundation of China (grant nos 31371559 and 31571599), Public Benefit Technology Applied Research Project of Zhejiang Province, China (2014C32035), the Chinese Academy of Agricultural Science Innovation Project (grant no. CAAS-ASTIP-2013-CNRR1), and Jiangsu Collaborative Innovation Center for Modern Crop Production (JCIC-MCP). We are grateful to the China National Rice Seed Bank for supplying the rice seed.

## References

- Ahmad P, Abdel LAA, Abd AEF, Hashem A, Sarwat M, Anjum NA, Gucel S. 2016. Calcium and potassium supplementation enhanced growth, osmolyte secondary metabolite production, and enzymatic antioxidant machinery in cadmium-exposed chickpea (*Cicer arietinum* L.). *Frontiers in Plant Science* **7**, 1–12.
- Ahmad P, Sarwat M, Bhat NA, Wani MR, Kazi AG, Tran LS. 2015. Alleviation of cadmium toxicity in *Brassica juncea* L. (Czern. & Coss.) by calcium application involves various physiological and biochemical strategies. *PLoS One* **10**, e0114571.
- Ané JM, Kiss GB, Riely BK, *et al.* 2004. *Medicago truncatula* DMI1 required for bacterial and fungal symbioses in legumes. *Science* **303**, 1364–1367.
- Beilby MJ. 1985. Potassium channels at *Chara* plasmalemma. *Journal of Experimental Botany* **36**, 228–239.
- Berkelaar E, Hale B. 2000. The relationship between root morphology and cadmium accumulation in seedlings of two durum wheat cultivars. *Canadian Journal of Botany* **78**, 381–387.
- Cailliatte R, Lapeyre B, Briat JF, Mari S, Curie C. 2009. The NRAMP6 metal transporter contributes to cadmium toxicity. *Biochemical Journal* **422**, 217–228.
- Cakmak I. 2005. The role of potassium in alleviating detrimental effects of abiotic stresses in plants. *Journal of Plant Nutrition and Soil Science* **168**, 521–530.
- Chang Y, Zouari M, Gogorcena Y, Lucena JJ, Abadía J. 2003. Effects of cadmium and lead on ferric chelate reductase activities in sugar beet roots. *Plant Physiology and Biochemistry* **41**, 999–1005.
- Charpentier M, Bredemeier R, Wanner G, Takeda N, Schleiff E, Parniske M. 2008. *Lotus japonicus* CASTOR and POLLUX are ion channels essential for perinuclear calcium spiking in legume root endosymbiosis. *The Plant Cell* **20**, 3467–3479.
- Clemens S. 2001. Molecular mechanisms of plant metal tolerance and homeostasis. *Planta* **212**, 475–486.
- Clemens S, Antosiewicz DM, Ward JM, Schachtman DP, Schroeder JL. 1998. The plant cDNA *LCT1* mediates the uptake of calcium and cadmium in yeast. *Proceedings of the National Academy of Sciences, USA* **95**, 1243–1248.
- Craig A, Hare L, Tessier A. 1999. Experimental evidence for cadmium uptake via calcium channels in the aquatic insect *Chironomus staegeri*. *Aquatic Toxicology* **44**, 255–262.
- Demidchik V, Davenport RJ, Tester M. 2002. Nonselective cation channels in plants. *Annual Review of Plant Biology* **53**, 67–107.
- Dvir H, Valera E, Choe S. 2010. Structure of the MthK RCK in complex with cadmium. *Journal of Structural Biology* **171**, 231–237.
- Edwards A, Heckmann AB, Yousafzai F, Duc G, Downie JA. 2007. Structural implications of mutations in the pea *SYM8* symbiosis gene, the *DMI1* ortholog, encoding a predicted ion channel. *Molecular Plant-Microbe Interactions* **20**, 1183–1191.
- Enstone DE, Peterson CA, Ma F. 2002. Root endodermis and exodermis: structure, function, and responses to the environment. *Journal of Plant Growth Regulation* **21**, 335–351.
- Farooq MA, Detterbeck A, Clemens S, Dietz KJ. 2016. Silicon-induced reversibility of cadmium toxicity in rice. *Journal of Experimental Botany* **67**, 3573–3585.
- Furuichi T, Cunningham KW, Muto S. 2001. A putative two pore channel AtTPC1 mediates  $Ca^{2+}$  flux in Arabidopsis leaf cells. *Plant & Cell Physiology* **42**, 900–905.
- He J, Qin J, Long L, *et al.* 2011. Net cadmium flux and accumulation reveal tissue-specific oxidative stress and detoxification in *Populus x canescens*. *Physiologia Plantarum* **143**, 50–63.
- He M, Yang X, Cui S, Mu G, Hou M, Chen H, Liu L. 2015. Molecular cloning and characterization of annexin genes in peanut (*Arachis hypogaea* L.). *Gene* **568**, 40–49.
- Hirschi KD, Korenkov VD, Wilganowski NL, Wagner GJ. 2000. Expression of *Arabidopsis* CAX2 in tobacco. Altered metal accumulation and increased manganese tolerance. *Plant Physiology* **124**, 125–133.
- Huddart H, Hill RB. 1996. Ionic dependency of membrane potential and autorhythmicity in the atrium of the whelk *Busycon canaliculatum*. *General Pharmacology* **27**, 819–825.
- Ishimaru Y, Suzuki M, Tsukamoto T, *et al.* 2006. Rice plants take up iron as an  $Fe^{3+}$ -phytosiderophore and as  $Fe^{2+}$ . *The Plant Journal* **45**, 335–346.
- Ishimaru Y, Takahashi R, Bashir K, *et al.* 2012. Characterizing the role of rice NRAMP5 in manganese, iron and cadmium transport. *Scientific Reports* **2**, 286.
- Jami SK, Clark GB, Ayele BT, Roux SJ, Kirti PB. 2012. Identification and characterization of annexin gene family in rice. *Plant Cell Reports* **31**, 813–825.
- Jiang Y, Lee A, Chen J, Cadene M, Chait BT, MacKinnon R. 2002. Crystal structure and mechanism of a calcium-gated potassium channel. *Nature* **417**, 515–522.
- Jones DL. 1998. Organic acids in the rhizosphere—a critical review. *Plant and Soil* **205**, 25–44.
- Kuo MM, Baker KA, Wong L, Choe S. 2007. Dynamic oligomeric conversions of the cytoplasmic RCK domains mediate MthK potassium channel activity. *Proceedings of the National Academy of Sciences, USA* **104**, 2151–2156.
- Kurusu T, Sakurai Y, Miyao A, Hirochika H, Kuchitsu K. 2004. Identification of a putative voltage-gated  $Ca^{2+}$ -permeable channel (OsTPC1) involved in  $Ca^{2+}$  influx and regulation of growth and development in rice. *Plant & Cell Physiology* **45**, 693–702.
- Laporte MA, Denaix L, Pagès L, Sterckeman T, Flénet F, Dauguet S, Nguyen C. 2013. Longitudinal variation in cadmium influx in intact first order lateral roots of sunflower (*Helianthus annuus* L.). *Plant and Soil* **372**, 581–595.
- Lee S, An G. 2009. Over-expression of *OsIRT1* leads to increased iron and zinc accumulations in rice. *Plant, Cell & Environment* **32**, 408–416.
- Li LZ, Liu XL, Peijnenburg WJG, Zhao JM, Chen XB, Yu JB, Wu HF. 2012. Pathways of cadmium fluxes in the root of the halophyte *Suaeda salsa*. *Ecotoxicology and Environmental Safety* **75**, 1–7.
- Li S, Yu J, Zhu M, Zhao F, Luan S. 2012. Cadmium impairs ion homeostasis by altering  $K^+$  and  $Ca^{2+}$  channel activities in rice root hair cells. *Plant, Cell & Environment* **35**, 1998–2013.
- Lindberg S, Landberg T, Greger M. 2004. A new method to detect cadmium uptake in protoplasts. *Planta* **219**, 526–532.

- Livak KJ, Schmittgen TD.** 2001. Analysis of relative gene expression data using real-time quantitative PCR and the 2<sup>-</sup>(Delta Delta C(T)) method. *Methods* **25**, 402–408.
- Lu L, Tian S, Zhang M, Zhang J, Yang X, Jiang H.** 2010. The role of Ca pathway in Cd uptake and translocation by the hyperaccumulator *Sedum alfredii*. *Journal of Hazardous Materials* **183**, 22–28.
- Lux A, Luxová M, Abe J, Morita S.** 2004. Root cortex: structural and functional variability and responses to environmental stress. *Root Research* **13**, 117–131.
- Lux A, Martinka M, Vaculík M, White PJ.** 2011. Root responses to cadmium in the rhizosphere: a review. *Journal of Experimental Botany* **62**, 21–37.
- Maathuis FJM, Sanders D.** 1996. Mechanisms of potassium absorption by higher plant roots. *Physiologia Plantarum* **96**, 158–168.
- Nawaz Z, Kakar KU, Saand MA, Shu QY.** 2014. Cyclic nucleotide-gated ion channel gene family in rice, identification, characterization and experimental analysis of expression response to plant hormones, biotic and abiotic stresses. *BMC Genomics* **15**, 853.
- Newman IA.** 2001. Ion transport in roots: measurement of fluxes using ion-selective microelectrodes to characterize transporter function. *Plant, Cell & Environment* **24**, 1–14.
- Ni J, Yu Z, Du G, Zhang Y, Taylor JL, Shen C, Xu J, Liu X, Wang Y, Wu Y.** 2016. Heterologous expression and functional analysis of rice GLUTAMATE RECEPTOR-LIKE family indicates its role in glutamate triggered calcium flux in rice roots. *Rice* **9**, 9.
- Perfus-Barbeoch L, Leonhardt N, Vavasseur A, Forestier C.** 2002. Heavy metal toxicity: cadmium permeates through calcium channels and disturbs the plant water status. *The Plant Journal* **32**, 539–548.
- Piñeros MA, Shaff JE, Kochian LV.** 1998. Development, characterization, and application of a cadmium-selective microelectrode for the measurement of cadmium fluxes in roots of *Thlaspi* species and wheat. *Plant Physiology* **116**, 1393–1401.
- Redjala T, Zelko I, Sterckeman T, Legue V, Lux A.** 2011. Relationship between root structure and root cadmium uptake in maize. *Environmental and Experimental Botany* **71**, 241–248.
- Rizwan M, Ali S, Adrees M, Rizvi H, Zia-Ur-Rehman M, Hannan F, Qayyum MF, Hafeez F, Ok YS.** 2016. Cadmium stress in rice: toxic effects, tolerance mechanisms, and management: a critical review. *Environmental Science and Pollution Research International* **23**, 17859–17879.
- Sasaki A, Yamaji N, Yokosho K, Ma JF.** 2012. Nramp5 is a major transporter responsible for manganese and cadmium uptake in rice. *The Plant Cell* **24**, 2155–2167.
- Schaaf G, Ludewig U, Erenoglu BE, Mori S, Kitahara T, von Wirén N.** 2004. ZmYS1 functions as a proton-coupled symporter for phytosiderophore- and nicotianamine-chelated metals. *Journal of Biological Chemistry* **279**, 9091–9096.
- Schreiber L, Hartmann K, Skrabs M, Zeier J.** 1999. Apoplastic barriers in roots: chemical composition of endodermal and hypodermal cell walls. *Journal of Experimental Botany* **50**, 1267–1280.
- Shabala S.** 2006. Non-invasive microelectrode ion flux measurements in plant stress physiology. In: **Volkov A**, ed. *Plant electrophysiology—theory and methods*. Heidelberg: Springer, 35–72.
- Shepherd VA, Beilby MJ, Al Khazaaly SA, Shimmen T.** 2008. Mechano-perception in *Chara* cells: the influence of salinity and calcium on touch-activated receptor potentials, action potentials and ion transport. *Plant, Cell & Environment* **31**, 1575–1591.
- Singh A, Kanwar P, Yadav AK, Mishra M, Jha SK, Baranwal V, Pandey A, Kapoor S, Tyagi AK, Pandey GK.** 2014. Genome-wide expressional and functional analysis of calcium transport elements during abiotic stress and development in rice. *FEBS Journal* **281**, 894–915.
- Souza V, Bucio L, Gutiérrez-Ruiz MC.** 1997. Cadmium uptake by a human hepatic cell line (WRL-68 cells). *Toxicology* **120**, 215–220.
- Sun J, Wang R, Liu Z, Ding Y, Li T.** 2013. Non-invasive microelectrode cadmium flux measurements reveal the spatial characteristics and real-time kinetics of cadmium transport in hyperaccumulator and nonhyperaccumulator ecotypes of *Sedum alfredii*. *Journal of Plant Physiology* **170**, 355–359.
- Swarbreck SM, Colaço R, Davies JM.** 2013. Plant calcium-permeable channels. *Plant Physiology* **163**, 514–522.
- Takahashi R, Ishimaru Y, Shimo H, et al.** 2014. From laboratory to field: *OsNRAMP5*-knockdown rice is a promising candidate for Cd phytoremediation in paddy fields. *PLoS One* **9**, e98816.
- Uraguchi S, Fujiwara T.** 2012. Cadmium transport and tolerance in rice: perspectives for reducing grain cadmium accumulation. *Rice* **5**, 5.
- Uraguchi S, Fujiwara T.** 2013. Rice breaks ground for cadmium-free cereals. *Current Opinion in Plant Biology* **16**, 328–334.
- Vincill ED, Bieck AM, Spalding EP.** 2012. Ca<sup>2+</sup> conduction by an amino acid-gated ion channel related to glutamate receptors. *Plant Physiology* **159**, 40–46.
- Wang C, Guo W, Ye S, Wei P, Ow DW.** 2016. Reduction of Cd in rice through expression of OXS3-like gene fragments. *Molecular Plant* **9**, 301–304.
- White PJ.** 2001. The pathways of calcium movement to the xylem. *Journal of Experimental Botany* **52**, 891–899.
- White PJ.** 2004. Calcium signals in root cells: the roles of plasma membrane calcium channels. *Biologia* **59/S13**, 77–83.
- White PJ, Bowen HC, Demidchik V, Nichols C, Davies JM.** 2002. Genes for calcium-permeable channels in the plasma membrane of plant root cells. *Biochimica et Biophysica Acta* **1564**, 299–309.
- White PJ, Broadley MR.** 2003. Calcium in plants. *Annals of Botany* **92**, 487–511.
- Yan Y, Choi D, Kim D, Lee B.** 2010. Genotypic variation of cadmium accumulation and distribution in rice. *Journal of Crop Science and Biotechnology* **13**, 69–73.
- Zeng F, Chen S, Miao Y, Wu F, Zhang G.** 2008. Changes of organic acid exudation and rhizosphere pH in rice plants under chromium stress. *Environmental Pollution* **155**, 284–289.
- Zhang Y, Sa G, Zhang Y, et al.** 2016. *Paxillus involutus*-facilitated Cd<sup>2+</sup> influx through plasma membrane Ca<sup>2+</sup>-permeable channels is stimulated by H<sub>2</sub>O<sub>2</sub> and H<sup>+</sup>-ATPase in ectomycorrhizal *Populus × canescens* under cadmium stress. *Frontiers in Plant Science* **7**, 1975.
- Zhou ML, Yang XB, Zhang Q, Zhou M, Zhao EZ, Tang YX, Zhu XM, Shao JR, Wu YM.** 2013. Induction of annexin by heavy metals and jasmonic acid in *Zea mays*. *Functional & Integrative Genomics* **13**, 241–251.
